# Supplementary material for: Plasmonic sphere-on-plane systems with semiconducting polymer spacer layers
Source: Royal Society of Chemistry journal article supplement (doi:10.1039/c8cp01314d), 2018-01-01
Supplement: c8cp01314d1.pdf [file c8cp01314d1.pdf]

**Supporting Information For:**

**Plasmonic Sphere-On-Plane Systems with Semiconducting  
Polymer Spacer Layers**

*Binxing Yu<sup>1</sup>, Jill I. Tracey<sup>1</sup>, Zhongkai Cheng<sup>1</sup>, Martin Vacha<sup>2</sup>, and Deirdre M.  
O'Carroll<sup>1,3\*</sup>*

<sup>1</sup> Rutgers University, Department of Chemistry & Chemical Biology, 610 Taylor Road,  
Piscataway, NJ 08854, USA

<sup>2</sup> Tokyo Institute of Technology, Department of Materials Science & Engineering,  
Ookayama 2-12-1, Meguro-ku, Tokyo, Japan

<sup>3</sup> Rutgers University, Department of Materials Science and Engineering, 607 Taylor Road,  
Piscataway, NJ 08854, USA

\*Corresponding Author. E-mail: ocarroll@rutgers.edu

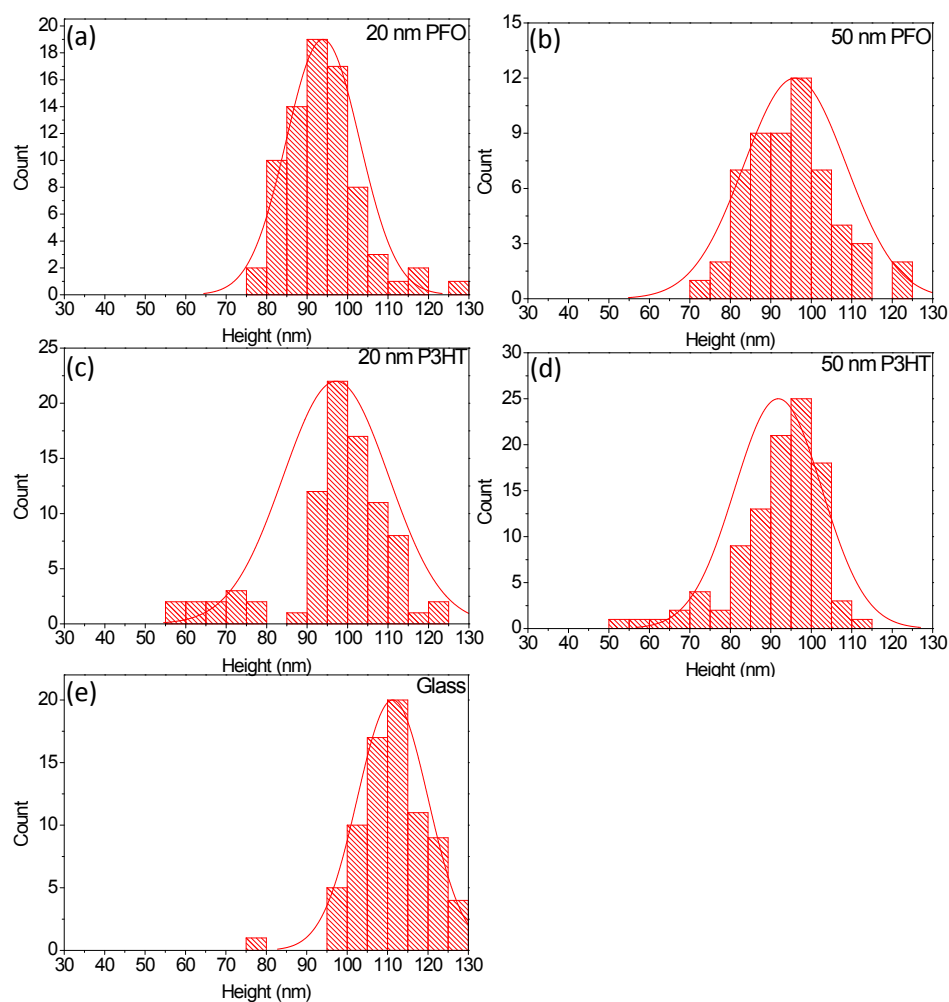

**Figure S1.** Histogram of the heights of AuNPs in the AuNP/polymer spacer/Au film system with various spacers: (a) 20 nm-thick PFO, (b) 50 nm-thick PFO, (c) 20 nm-thick P3HT, (d) 50 nm-thick P3HT, (e) AuNP directly on glass as a reference. Data were taken for at least 50 nm NPs in each case.
